# Supplementary material for: A twenty-year follow-up of canine leishmaniosis in three military kennels in southeastern France
Source: Springer Nature journal article supplement (doi:10.1186/1756-3305-6-323), 2013-11-09

# Beginning of the prevention with DMC

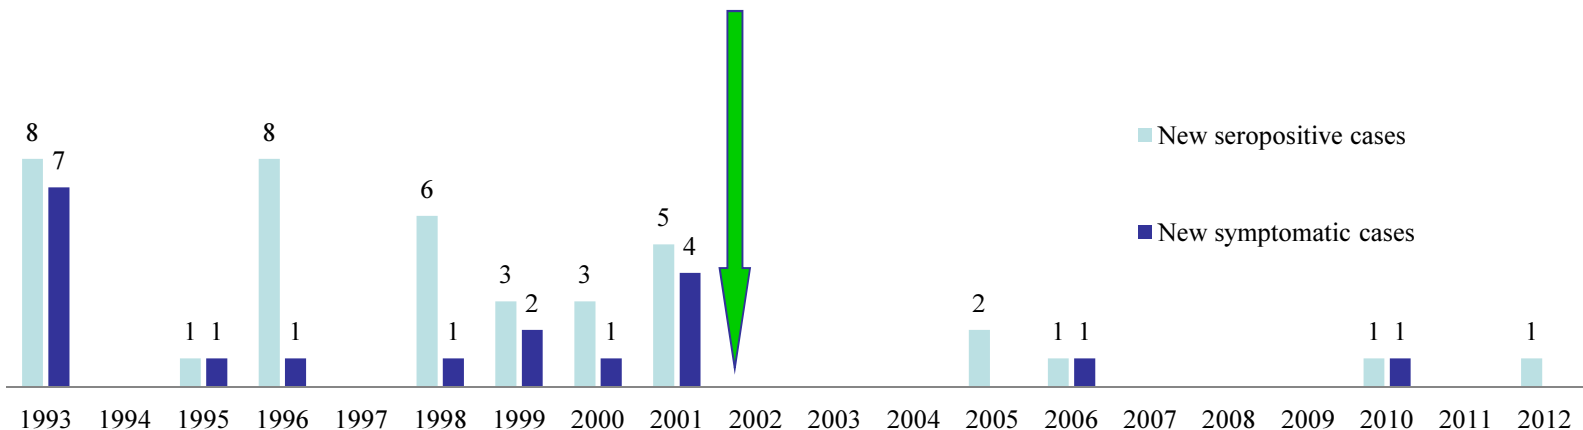

Supplement: 13071_2013_1109_MOESM1_ESM.pdf [file 13071_2013_1109_MOESM1_ESM.pdf]
